# Supplementary material for: Multiple photosynthetic reaction centres using zinc porphyrinic oligopeptide–fulleropyrrolidine supramolecular complexes
Source: Royal Society of Chemistry journal article supplement (doi:10.1039/c1cp22364j), 2011-01-01
Supplement: c1cp22364j.pdf [file c1cp22364j.pdf]

## Electronic Supplementary Information

### Multiple photosynthetic reaction centres using zinc porphyrinic oligopeptide-fulleropyrrolidine supramolecular complex†

Shunichi Fukuzumi,<sup>\*a,b</sup> Kenji Saito,<sup>a</sup> Kei Ohkubo,<sup>a</sup> Vincent Troiani,<sup>c</sup> Hongjin Qiu,<sup>c</sup> Suresh Gadde,<sup>d</sup> Francis D'Souza<sup>\*d</sup> and Nathalie Solladié<sup>\*c</sup>

<sup>a</sup> Department of Material and Life Science, Graduate School of Engineering, Osaka University, ALCA, Japan Science and Technology Agency (JST), 2-1 Yamada-oka, Suita, Osaka 565-0871, Japan. Fax: +81-6-6879-7370; Tel: +81-6-6879-7368; E-mail: fukuzumi@chem.eng.osaka-u.ac.jp

<sup>b</sup> Department of Bioinspired Science, Ewha Womans University, Seoul, 120-750, Korea.

<sup>c</sup> Group of Synthesis of Multiporphyrinic Systems, Laboratoire d'Electrochimie et de Chimie Physique du Corps Solide Institut Le Bel, 4 rue Blaise Pascal 67070, Strasbourg, France. E-mail: nsolladie@chimie.u-strasbg.fr

<sup>d</sup> Department of Chemistry, Wichita State University, 1845 Fairmount, Wichita, Kansas 67260-0051, USA.

<sup>e</sup> Department of Chemistry, University of North Texas, 1155, Union Circle, #305070, Denton, Texas 76203-5017, USA. E-mail: Francis.DSouza@unt.edu

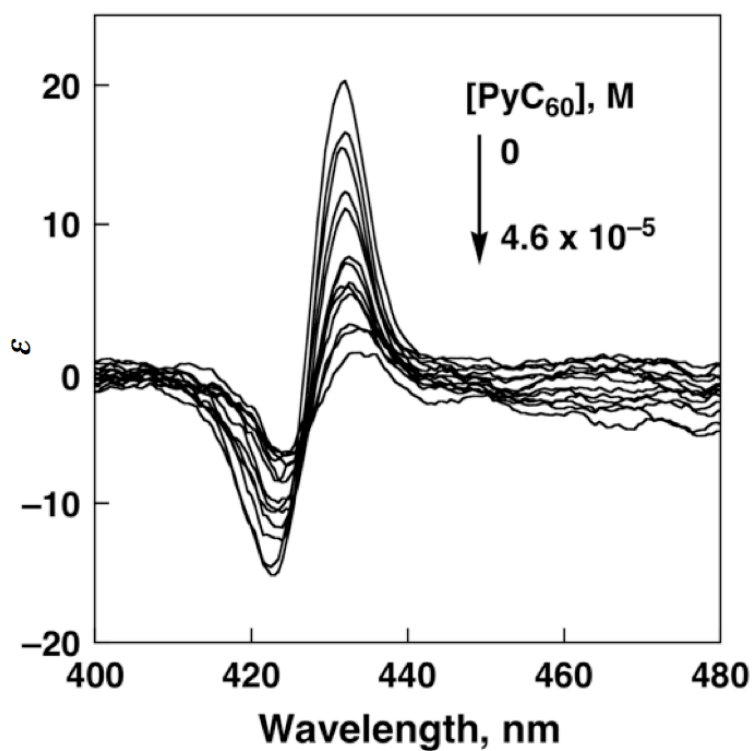

**Fig. S1** Circular dichroism (CD) spectra of P(ZnP)<sub>8</sub> ( $4.3 \times 10^{-6}$  M based on one porphyrin unit) in the presence of various concentration of PyC<sub>60</sub> (0 to  $4.6 \times 10^{-5}$  M) in PhCN.

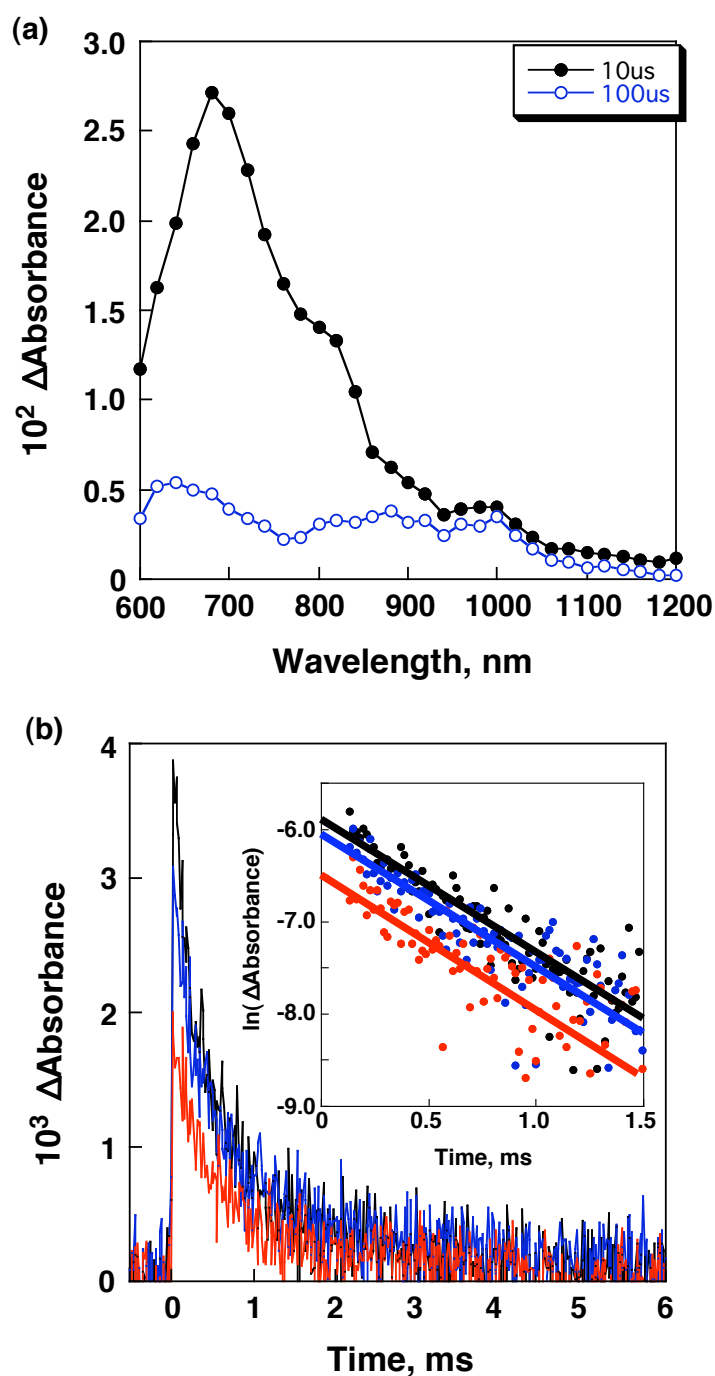

**Fig. S2** (a) Transient absorption spectra of P(ZnP)<sub>8</sub> ( $2.9 \times 10^{-6}$  M) in the presence of ImC<sub>60</sub> ( $4.9 \times 10^{-3}$  M) in deaerated PhCN at 298 K taken at 70 (solid line with black circles) and 350  $\mu$ s (solid line with white circles) after laser excitation at 561 nm (4 mJ/pulse), respectively. (b) Time profiles of the absorption at 1000 nm due to ImC<sub>60</sub><sup>-</sup> with different laser powers (4, 2 and 1 mJ/pulse) at 298 K. Inset: First-order plots.
